# Supplementary material for: Porous MnO nanoplate–graphene hybrid as a high-capacity anode material for lithium ion batteries and its safety characteristics
Source: Royal Society of Chemistry journal article supplement (doi:10.1039/d3nj04986h), 2023-12-22
Supplement: d3nj04986h1.pdf [file d3nj04986h1.pdf]

## **Porous MnO nanoplates-graphene hybrid as a high-capacity anode material for lithium ion batteries and its safety characteristics**

Xiang-Ning Song,<sup>a†</sup> Qian Ma,<sup>a†</sup> Yuan Yuan,<sup>a</sup> Ke-Feng Wan,<sup>a</sup> Hong-Zhe Zhang,<sup>\*a</sup> and Lang Huang<sup>\*b</sup>

<sup>a</sup> State Key Laboratory of Chemical Safety, SINOPEC Research Institute of Safety Engineering Co., Ltd., Qingdao 266104, China. E-mail: songxn.qday@sinopec.com

<sup>b</sup> Qingdao Institute of Bioenergy and Bioprocess Technology, Chinese Academy of Sciences, Qingdao 266101, China. E-mail: huanglang@qibebt.ac.cn

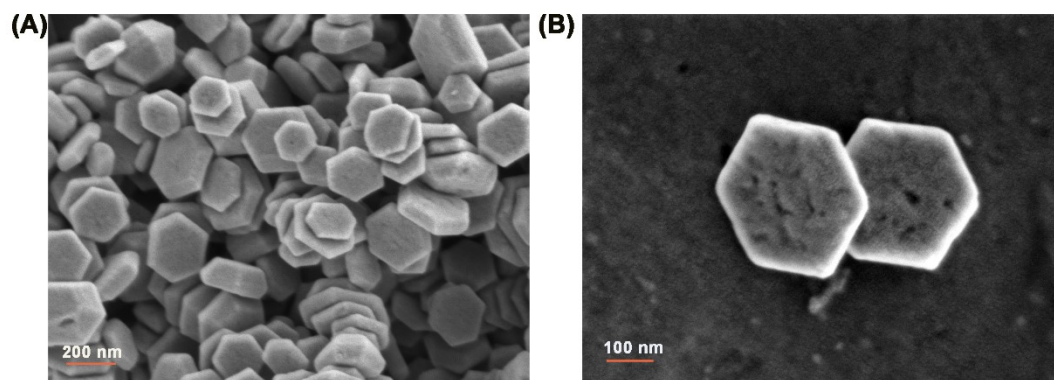

Fig. S1 the SEM images of MnO.

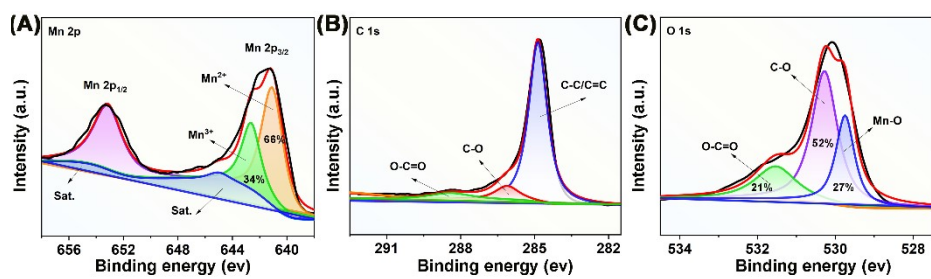

Fig. S2 XPS spectra of MnO-rGO: (A) Mn 2p, (B) C 1s, and (C) O 1s spectra.
